# Supplementary material
Source: Research Square preprint supplement (doi:10.21203/rs.3.rs-8758780/v1)
Supplement: Supplementary file 1 [file 1d4ac1db492e249e08a5f9f3.docx]

| Predictor | Estimate | SE | t | p-value |
| --- | --- | --- | --- | --- |
| Intercept | 42.56 | 10.09 | 4.217 | <0.001* |
| Sex (male) | 0.05 | 0.21 | 0.245 | 0.808 |
| Age (years) | -0.004 | 0.009 | -0.517 | 0.608 |
| Waist circumference (cm) | 0.011 | 0.011 | 0.956 | 0.344 |
| Body mass index (kg/m²) | -0.020 | 0.030 | -0.674 | 0.504 |
| Capillary Density Index | -78.55 | 18.13 | -4.332 | <0.001* |
| Mean arterial pressure (mmHg) | 0.013 | 0.007 | 1.865 | 0.068 |

**Table 5:** Multiple linear regression analysis for predictors of albuminuria. Estimate=regression coefficient; SE=standard error; t=t-statistic; * p-value < 0.05
