# Supplementary material
Source: Research Square preprint supplement (doi:10.21203/rs.3.rs-8758780/v1)
Supplement: Supplementary file 2 [file 22335018a7a2a4b1242c19c9.docx]

**Retinal vascular indexes and renal function in hypertensive patients: relationship between different microvascular networks**

Maria Vadalà1,2, Caterina Carollo3, Alessandra Sorce3, Domenico Amato4,

Giosuè Lo Bosco2,4, Alberto La Felice1, Enea Chisci1, Giuseppe Mulè3, Vincenza Maria Elena Bonfiglio1 on behalf of the FIORIRE group

## **Methods – Appendix 1**

Angio-OCT images underwent pre-processing steps to extract key features for subsequent analysis. Using image binarization, grayscale images were converted into binary images. The adaptive Niblack algorithm [1] was employed, which calculates the threshold **T** locally for each pixel within a 3×3 window as follows:

**T = μ + k · σ**

where μ and σ represent the mean and standard deviation of pixel intensities within the window, respectively, and k=0.2. Following binarization, the binary object was reduced to a 1-pixel-wide representation using skeletonization. Peripheral pixels were then iteratively removed using the Zhang thinning algorithm [2] until image stabilization was achieved.

The image was divided into four quadrants: superonasal, superotemporal, inferonasal, and inferotemporal. Fractal Dimension (FD), Vessel Tortuosity (VT), Vessel Length Density (VLD) and Capillary Density Index (CDI) were calculated for each quadrant and a mean of the area. Formulas of each parameter are reported.

**Fractal Dimension (FD) measurement**

The Fractal Dimension (FD) is employed to quantify the complexity of a given pattern, e.g. the vessel morphology in OCT image. Its estimation is achieved through the application of the box-counting method. The binarized and skeletonized image is initially overlaid with a grid of N boxes, each with an initial side length of L. The number of boxes, denoted as N(L), is then determined. Subsequently, the process is iterated by subdividing each box containing a white pixel into smaller boxes, and N(L) is recalculated for each iteration. A log-log plot of L versus N(L) is then generated, and the FD is computed as the slope of this plot using a linear least squares regression analysis [3,4].

### **Vessel Tortuosity (VT) measurement**

Vessel Tortuosity (VT) is defined as the ratio between the sum of the actual lengths of all vessel branches and the sum of the Euclidean distances between the start and end points of each branch. Mathematically, it can be expressed as

where Branches represents the set of all branches identified within the skeletonized image, length(b) denotes the sum of white pixels constituting branch b, and EUDist represents the Euclidean distance function. The small constant ε is introduced to prevent division by zero in cases where only circular branches exist [5].

### **Vessel Length Density (VLD) measurement**

The VLD is defined as the total length of blood vessels within the acquired image, excluding the Foveal Avascular Zone (FAZ). The total vessel length is computed using the following formula:

where Skel and Bin represent the operations of skeletonization and binarization of the image, respectively, and computes the image area [6].

### **Capillary Density Index (CDI) measurement**

Capillary density index (CDI) is defined as the ratio of the luminal area to the total area of the unit area under study. It was calculated on the white pixels of the binarized image within a circular region centered on the image center, with a radius equal to half the image width.

The CDI for each quadrant was calculated as the ratio of white pixels to the total area of the quadrant. The global CDI was computed as the mean of the four quadrant values.

### Mathematically, this can be expressed as:

###

Where the area of the image corresponding to the quadrant . The global CDI is then calculated as the mean of the CDI values of all four quadrants [7].

**References**

1. Niblack W. *An Introduction to Digital Image Processing*. Strandberg Publishing Company; 1985.
2. Zhang TY, Suen CY. A fast parallel algorithm for thinning digital patterns. *Commun ACM*. 1984;27(3):236-239. doi:10.1145/357994.358023
3. Mandelbrot B. The fractal geometry of nature, New York: W. H. Freeman and Comp, 1983.
4. Masters BR. Fractal analysis of the vascular tree in the human retina. Annu Rev Biomed Eng. 2004;6:427-52. doi: 10.1146/annurev.bioeng.6.040803.140100. PMID: 15255776.
5. Lee H, Lee M, Chung H, Kim HC. Quantification of retinal vessel tortuosity in diabetic retinopathy using optical coherence tomography angiography. Retina. 2018 May;38(5):976-985. doi: 10.1097/IAE.0000000000001618. PMID: 28333883.
6. Samara WA, Shahlaee A, Adam MK, Khan MA, Chiang A, Maguire JI, Hsu J, Ho AC. Quantification of Diabetic Macular Ischemia Using Optical Coherence Tomography Angiography and Its Relationship with Visual Acuity. Ophthalmology. 2017 Feb;124(2):235-244. doi: 10.1016/j.ophtha.2016.10.008. Epub 2016 Nov 23. PMID: 27887743.
7. Ting DSW, Tan GSW, Agrawal R, Yanagi Y, Sie NM, Wong CW, San Yeo IY, Lee SY, Cheung CMG, Wong TY. Optical Coherence Tomographic Angiography in Type 2 Diabetes and Diabetic Retinopathy. JAMA Ophthalmol. 2017 Apr 1;135(4):306-312. doi: 10.1001/jamaophthalmol.2016.5877. PMID: 28208170.
