# Supplementary material
Source: Research Square preprint supplement (doi:10.21203/rs.3.rs-8758780/v1)
Supplement: Supplementary file 3 [file 264a7128e077a1a3518101e2.docx]

**Retinal vascular indexes and renal function in hypertensive patients: relationship between different microvascular networks**

## **Appendix 2 – FIORIRE GROUP**

1. **Domenico Amato**, PhD, Department of Mathematics and Computer Science, University of Palermo
2. **Roberto Barcellona**, MD, Biomedicine, Neuroscience and Advance Diagnostic (BIND) Department, University of Palermo, Palermo, Italy.
3. **Miriam Bennici**, MD, Department of Health Promotion, Mother and Child Care, Internal Medicine and Medical Specialties (PROMISE), Unit of Nephrology and Hypertension, European Society of Hypertension Excellence Centre, University of Palermo
4. **Vincenza Maria Elena Bonfiglio**, MD, PhD, Biomedicine, Neuroscience and Advance Diagnostic (BIND) Department, University of Palermo, 90133 Palermo, Italy.
5. **Salvatore Calderaro,** PhD,Department of Mathematics and Computer Science, University of Palermo
6. **Caterina Carollo**, MD, Department of Health Promotion, Mother and Child Care, Internal Medicine and Medical Specialties (PROMISE), Unit of Nephrology and Hypertension, European Society of Hypertension Excellence Centre, University of Palermo
7. **Massimo Castellucci**, MD, Biomedicine, Neuroscience and Advance Diagnostic (BIND) Department, University of Palermo, Palermo, Italy
8. **Enea Chisci**, MD, Biomedicine, Neuroscience and Advance Diagnostic (BIND) Department, University of Palermo, Palermo, Italy.
9. **Giosuè Lo Bosco**, PhD,Department of Mathematics and Computer Science, University of Palermo; Euro-Mediterranean Institute of Science and Technology, IEMEST, Palermo
10. **Alberto La Felice**, MD, Biomedicine, Neuroscience and Advance Diagnostic (BIND) Department, University of Palermo, Palermo, Italy.
11. **Giuseppe Mulè,** MD, Department of Health Promotion, Mother and Child Care, Internal Medicine and Medical Specialties (PROMISE), Unit of Nephrology and Hypertension, European Society of Hypertension Excellence Centre, University of Palermo
12. **Alessandra Sorce**, Department of Health Promotion, Mother and Child Care, Internal Medicine and Medical Specialties (PROMISE), Unit of Nephrology and Hypertension, European Society of Hypertension Excellence Centre, University of Palermo
13. **Maria Vadalà,** MD, PhD, FEBO, Biomedicine, Neuroscience and Advance Diagnostic (BIND) Department, University of Palermo, Palermo, Italy; Euro-Mediterranean Institute of Science and Technology, IEMEST, Palermo
14. **Riccardo Rizzo**, Institute for High performance Computing and Networking, National Research Council of Italy, Palermo , Italy
15. **Filippo Vella**,Institute for High performance Computing and Networking, National Research Council of Italy, Palermo, Italy
