# Supplementary material
Source: Research Square preprint supplement (doi:10.21203/rs.3.rs-8758780/v1)
Supplement: Supplementary file 4 [file 722bd057b876ba074d02c24c.docx]

|  | **TOTAL (n=61)** | **eGFR>60 (n=55)** | **eGFR<60 (n=6)** | **P** |
| --- | --- | --- | --- | --- |
| **Male sex, n%** | 75.4 | 74.1 | 85.7 | 0.050* |
| **Age, years (range)** | 55 (53-59) | 54.5 (45-62) | 60.5 (55-63) | 0.175 |
| **Weight, Kg (range)** | 82 (77.5-89) | 82 (69-93) | 92 (69-113) | 0.289 |
| **BMI, Kg/m^2 (range or ± SD)** | 27 (25.4-28.2) | 27.7 ± 5 | 32 ± 7 | 0.06 |
| **Waist circumference, cm ± SD** | 101.3 ± 14 | 99.9 ± 13 | 114.5 ± 18 | 0.016* |
| **Haemoglobin, g/dL (range)** | 14.4 (14.1-14.6) | 14.5 (13.6-14.9) | 14.3 (13.5-15) | 0.634 |
| **Glycemia, mg/dL ± SD** | 92 ± 9 | 91.5 ± 8.5 | 95 ± 14 | 0.114 |
| **Total Cholesterol, mg/dL ± SD** | 176 ± 44 | 176 ± 45 | 185.2 ± 34 | 0.677 |
| **LDL Cholesterol, mg/dL ± SD** | 108 ± 40 | 53 ± 10 | 53 ± 11 | 0.97 |
| **HDL Cholesterol, mg/dL (range)** | 51 (49-56) | 51.5 (44-57) | 53 (47-57) | 0.79 |
| **Triglycerides, mg/dL (range)** | 99 (78-125) | 99 (76-138) | 78 (76-125) | 0.743 |
|  |  |  |  |  |
|  |  |  |  |  |
| **Table 1**. Demographic and laboratory characteristics of the overall sample and of the two subgroups. | | | | |
| Legend: * p value <0.05 |  |  |  |  |
|  |  |  |  |  |

| **Blood Pressure profile** | **TOTAL** | **eGFR>60** | **eGFR<60** | **p** |  |  |  |
| --- | --- | --- | --- | --- | --- | --- | --- |
|  | **(n=61)** | **(n=55)** | **(n=6)** |  |  |  |  |
| **Mean arterial pressure mmHg ± SD** | 108±14 | 107±18 | 122±18 | **0.013*** |  |  |  |
| **SBP mmHg, ± SD** | 139±20 | 137±18 | 159±28 | **0.011*** |  |  |  |
| **DBP mmHg ± SD** | 84±11 | 83±11 | 93±10 | 0.056 |  |  |  |
| **Pulse pressure mmHg, (range)** | 53 (48-58) | 53 (44-63) | 72 (46-87) | 0.06 |  |  |  |
| **Heart rate bpm, (range)** | 73 (70-75) | 73 (66-79) | 71 (69-77) | 0.749 |  |  |  |
| **Mean 24h SBP mmHg ± SD** | 129±11 | 129±11 | 129±13 | 0.969 |  |  |  |
| **Mean daytime SBP mmHg ± SD)** | 133±12 | 129±13 | 133±12 | 0.480 |  |  |  |
| **Mean nocturnal SBP mmHg ± SD** | 117±12 | 117±12 | 119±16 | 0.818 |  |  |  |
| **Mean 24h DBP mmHg, (range)** | 81 (78-84) | 82 (76-86) | 80 (74-90) | 0.778 |  |  |  |
| **Mean daytime DBP mmHg ± SD** | 85±8 | 86±8 | 84±9 | 0.694 |  |  |  |
| **Mean nocturnal DBP mmHg ± SD** | 75±8 | 75±8 | 75±9 | 0.930 |  |  |  |
| **Mean 24h PP mmHg ± SD** | 46±10 | 46±10 | 45±16 | 0.07 |  |  |  |
| **Mean daytime PP mmHg ± SD** | 47±11 | 47±11 | 45±16 | 0.654 |  |  |  |
| **Mean nocturnal PP mmHg ± SD** | 35±18 | 34±20 | 37±6 | 0.728 |  |  |  |
| **Mean 24h HR bpm, (range)** | 70 (64-73) | 70 (63-79) | 66 (62-70) | 0.168 |  |  |  |
| **Mean daytime HR bpm ± SD** | 73±11 | 73±11 | 69±6 | 0.193 |  |  |  |
| **Mean nocturnal HR bpm ± SD** | 63±9 | 64±9 | 59±3 | 0.223 |  |  |  |
|  |  |  |  |  |  |  |  |
| **Table 2.** Patients' BP profiles, parameters from both office BP measurements and 24-hour  ambulatory BP monitoring. | | | | | | | |
| Legend: SBP systolic BP, DBP diastolic BP, PP pulse pressure, HR heart ratio, * p value <0.05 | | | | | |  |  |

|  |  | |  | |  | |  | |  | |  | | |  |
| --- | --- | --- | --- | --- | --- | --- | --- | --- | --- | --- | --- | --- | --- | --- |
| **OCT and OCTA parameters** | | **TOTAL** | | | | **eGFR>60** | | **eGFR<60** | | **p** | |
| **(n=61)** | | | | **(n=55)** | | **(n=6)** | |
| **CRT central (µm ± SD)** | | 240.8 ± 21.4 | | 242.77 ± 47.81 | | | | 241.38 ± 18.32 | | 0.837 | |
| **CRT inner (µm ± SD)** | | 308.3 ± 18.2 | | 309.71 ± 57.08 | | | | 306.26 ± 14.30 | | 0.368 | |
| **CRT outer (µm ± SD)** | | 268.9 ± 15.4 | | 266.89 ± 49.84 | | | | 263.98 ± 16.93 | | 0.484 | |
| **ChT central (µm ± SD)** | | 264.9 ± 61.3 | | 267.9 ± 84.9 | | | | 261.2 ± 76.7 | | 0.386 | |
| **ChT inner (µm ± SD)** | | 269.3 ± 64.2 | | 272.09 ± 83.93 | | | | 252.22 ± 62.49 | | 0.231 | |
|  |
| **ChT outer (µm ± SD)** | | 236.6 ± 58.1 | | 242.03 ± 72.82 | | | | 227.05 ± 63.11 | | 0.331 | |  |
| **FAZ % S (% ± SD)** | | 62.3 ± 2.3 | | 61.2 ± 1.64 | | | | 63.2 ± 2.37 | | 0.004* | |  |
| **FAZ % D (% ± SD)** | | 62.3 ± 2.6 | | 61.2 ± 2.01 | | | | 63.1± 2.73 | | 0.019* | |  |
| **VD S Inner (% ± SD)** | | 37.7 ± 2.3 | | 38.8 ± 1.64 | | | | 36.8 ± 2.7 | | 0.004* | |  |
| **VD D Inner (% ± SD)** | | 37.6 ± 2.8 | | 38.8 ± 2.1 | | | | 36.7 ± 2.9 | | 0.002* | |  |
| **VD S Outer (% ± SD)** | | 40.8 ± 1.71 | | 41.5 ±1.1 | | | | 40.2 ± 1.8 | | 0.012* | |  |
| **VD D Outer (% ± SD)** | | 41.1 ± 1.75 | | 42.0 ± 1 | | | | 40.4 ± 1.8 | | <0.001* | |  |

**Table 3:** OCT and OCTA parameters

Legend: CRT: mean central retinal thickness in the 1 mm (CRT central). 3 mm (CRT inner) and 6 mm centred circle (CRT outer)
ChT: mean choroidal thickness in the 1 mm (ChT central). 3 mm (ChT inner) and 6 mm centred circle (ChT outer)
FAZ %: percentage of avascularity of the FAZ area for superficial (FAZ % S) and deep vascular plexus (FAZ % D)
VD: Vascular density as percentage of area in the inner superficial (VD S Inner) and deep plexus (VD D Inner) and in the outer superficial (VD S Outer) and deep plexus (VD D Outer)
SD: standard deviation, * p <0.05

| **OCTA vascular parameters** | **TOTAL** | **eGFR>60** | **eGFR<60** | **p** |
| --- | --- | --- | --- | --- |
| **(n=61)** | **(n=55)** | **(n=6)** |
| **FD (mean ± SD)** | 3.06 ± 0.02 | 3.06 ± 0.02 | 2.97 ± 0.49 | 0.303 |
|  |
| **VT (mean ± SD)** | 31343.3 ± 4602.3 | 31460.8 ± 2470.6 | 29728.6 ± 5872.6 | 0.127 |  |
| **VLD** | 0.23 ± 0.01 | 0.23 ± 0.01 | 0.22 ± 0.04 | 0.112 |  |
| **(mm/mm2± SD)** |  |
| **CDI (mean ± SD)** | 0.53 ± 0.005 | 0.540 ± 0.006 | 0.534 ± 0.004 | <0.001* |  |

| **Table 4:** computational vascular parameters |
| --- |
| Legend: FD: fractal dimension, VT: vessel tortuosity, VLD: vessel length density, CDI: capillary density index, SD: standard deviation, * p <0.05. |
